# Supplementary material
Source: Research Square preprint supplement (doi:10.21203/rs.3.rs-9448582/v1)
Supplement: Supplementary file 1 [file 513fc7337f48c4724a06c919.docx]

| Suppl. Table 1. Comparison with participants and non-participants | | | | |
| --- | --- | --- | --- | --- |
| Variable | Participants (n=2127) | Non-participants (n=1113) | Analytic sample (n=1014) |  |
| Mean (SD) | Mean (SD) | Mean (SD) | p value† |
| Age (years) | 48.4 (5.0) | 48.2 (4.9) | 48.6 (5.1) | 0.050 |
| Sex |  |  |  |  |
| Women | 55.0 | 50.0 | 39.5 | < 0.001 |
| Men | 45.0 | 50.0 | 60.5 |  |
| Cognitive domains‡ | | | | |
| Learning and memory | 0.21 (2.01) | 0.07 (2.07) | 0.35 (1.93) | 0.002 |
| Working memory | 0.45 (2.10) | 0.32 (2.10) | 0.59 (2.10) | 0.003 |
| Reaction time | 0.15 (0.81) | 0.10 (0.85) | 0.21 (0.75) | 0.001 |
| Information processing | 0.70 (1.18) | 0.58 (1.22) | 0.82 (1.12) | <0.001 |
| Overall cognitive performance | 0.41 (2.41) | 0.20 (2.52) | 0.61 (2.29) | <0.001 |
| Compositional time-use (min/day) | | | | |
| Time in bed | 418.3 (65.5) | 419.9 (72.4) | 417.7 (62.9) | 0.606 |
| Occupational sedentary time | 312.5 (101.1) | 295.8 (113.9) | 315.9 (98.0) | 0.019 |
| Leisure-time sedentary time | 389.0 (84.6) | 400.7 (94.2) | 386.6 (82.4) | 0.047 |
| Occupational light physical activity | 130.9 (76.2) | 132.6 (80.6) | 130.5 (75.4) | 0.739 |
| Leisure-time light physical activity | 135.5 (43.3) | 139.1 (48.9) | 134.8 (42.0) | 0.234 |
| Moderate-to-vigorous physical activity | 55.3 (32.3) | 52.6 (31.0) | 56.2 (32.7) | 0.066 |
| Body mass index (kg/m2) | 27.8 (5.4) | 28.3 (5.7) | 27.3 (4.9) | <0.001 |
| Systolic blood pressure (mmHg) | 129.6 (15.9) | 130.1 (16.2) | 129.1 (15.5) | 0.129 |
| Serum total cholesterol (mmol/L) | 5.2 (1.0) | 5.2 (1.0) | 5.2 (1.0) | 0.980 |
| Diet quality index (range 0-27)‡ | 13.3 (4.0) | 12.9 (4.0) | 13.5 (4.0) | 0.001 |
| Education (years) | 15.7 (3.7) | 15.4 (3.7) | 16.1 (3.6) | <0.001 |
| Income, annual (%) | | | | |
| <€25,000 | 17.4 | 24.1 | 10.9 | <0.001 |
| €25,000–45,000 | 43.9 | 39.9 | 47.7 |  |
| €45001−70000 | 27.6 | 25.0 | 30.1 |  |
| > €70000 | 11.1 | 11.0 | 11.2 |  |
| Smoking status (%) | | | | |
| Non-smoker | 48.4 | 43.2 | 53.6 | <0.001 |
| Occasional/past smoker | 30.4 | 29.9 | 31.0 |  |
| Smoker | 21.2 | 27.0 | 15.4 |  |
| Alcohol use (%) | | | | |
| Rarely or not at all | 7.7 | 9 | 6.4 | 0.003 |
| Occasionally | 85.4 | 82.8 | 88.1 |  |
| Heavy drinking | 6.9 | 8.3 | 5.5 |  |
| Work schedule (%) | | | | |
| Not working | 6.7 | 13.4 | 0.0 | <0.001 |
| Shift | 28.3 | 30.1 | 26.5 |  |
| Day job | 65 | 56.5 | 73.5 |  |
| Accelerometry quality control | | | | |
| Valid days measured | 6.9 (0.5) | 6.8 (0.7) | 6.9 (0.4) | 0.014 |
| Valid nights measured | 6.6 (0.8) | 6.5 (0.9) | 6.6 (0.7) | 0.020 |
| Valid workdays measured | 4.2 (1.8) | 2.6 (2.4) | 4.7 (1.0) | <0.001 |
| Work hours per day | 8.0 (1.5) | 7.7 (1.9) | 8.0 (1.4) | 0.019 |
| †The p-value from independent t test or χ2 test.  ‡Higher scores represent better cognitive performance or diet quality. | | | | |

| Suppl. Table 2. Variation matrices for parts of composition of behaviors by physical workload | | | | | |
| --- | --- | --- | --- | --- | --- |
|  | Sleep | Occupational ST | Leisure-time ST | Occupational LPA | Leisure-time LPA |
| Sedentary work | | | | | |
| Sleep | - |  |  |  |  |
| Occupational ST | 0.07 | - |  |  |  |
| Leisure-time ST | 0.10 | 0.13 | - |  |  |
| Occupational LPA | 0.24 | 0.30 | 0.26 | - |  |
| Leisure-time LPA | 0.15 | 0.21 | 0.12 | 0.27 | - |
| MVPA | 0.38 | 0.45 | 0.42 | 0.47 | 0.36 |
|  |  |  |  |  |  |
| Light standing/moving work | |  |  |  |  |
| Sleep | - |  |  |  |  |
| Occupational ST | 0.12 | - |  |  |  |
| Leisure-time ST | 0.10 | 0.20 | - |  |  |
| Occupational LPA | 0.23 | 0.36 | 0.29 | - |  |
| Leisure-time LPA | 0.13 | 0.25 | 0.13 | 0.31 | - |
| MVPA | 0.43 | 0.60 | 0.52 | 0.48 | 0.44 |
|  | |  |  |  |  |
| Heavy physical work | |  |  |  |  |
| Sleep | - |  |  |  |  |
| Occupational ST | 0.28 | - |  |  |  |
| Leisure-time ST | 0.19 | 0.45 | - |  |  |
| Occupational LPA | 0.22 | 0.47 | 0.35 | - |  |
| Leisure-time LPA | 0.19 | 0.57 | 0.16 | 0.39 | - |
| MVPA | 0.71 | 1.17 | 0.92 | 0.77 | 0.77 |
| Note: Within the cells, there are variances of log-ratios of behaviors on the corresponding row and column for given group of participants.  Abbreviations: ST, sedentary time; LPA, light-intensity physical activity; MVPA, moderate-to-vigorous physical activity. | | | | | |
